# Supplementary material for: LC-ESI/LTQ-Orbitrap-MS Based Metabolomics in Evaluation of Bitter Taste of Arbutus unedo Honey
Source: MDPI journal article supplement (doi:10.3390/molecules26092765), 2021-05-08
Supplement: s1 [file s1]

## Article

# LC-ESI/LTQ-Orbitrap-MS Based Metabolomics in Evaluation of Bitter Taste of *Arbutus unedo* Honey

## Supporting information

Paola Montoro <sup>1</sup>, Gilda D'Urso <sup>1</sup>, Adam Kowalczyk <sup>2</sup> and Carlo Ignazio Giovanni Tuberose <sup>3,\*</sup>

<sup>1</sup> Department of Pharmacy, University of Salerno, via Giovanni Paolo II, 132, 84084 Fisciano (SA), Italy; pmontoro@unisa.it (P.M.); gidurso@unisa.it (G.D'U.)

<sup>2</sup> Department of Pharmacognosy and Herbal Medicines, Wrocław Medical University, ul. Borowska, 211, 50-556 Wrocław, Poland; adam.kowalczyk@umed.wroc.pl

<sup>3</sup> Department of Life and Environmental Sciences, University of Cagliari, University Campus, S.P. Monserrato-Sestu km 0.700 - 09042 Monserrato (CA), Italy; tuberose@unica.it

\* Correspondence: tuberose@unica.it; Tel.: +39-070-675-8644

### Table of Contents

**Table S1.** Sensory analysis results (5 judges, mean  $\pm$  sd) of the bitter perception in the 21 fractions obtained from the fractioning of strawberry tree honey on C18 column.

**Figure S1.** LC-DAD representative chromatograms at  $\lambda = 262$  nm of fraction B, fraction Z, and pure strawberry tree honey (dilution 1:100 in water w/v). *t,t*-ABA: ( $\pm$ )-2-*trans*,4-*trans*-abscisic acid; *c,t*-ABA: ( $\pm$ )-2-*cis*,4-*trans*-abscisic acid; U: unedone; HGA: homogentisic acid. Chromatographic conditions are described in the text.

**Table S1.** Sensory analysis results (5 judges, mean  $\pm$  sd) of the bitter perception in the 21 fractions obtained from the fractioning of strawberry tree honey on C18 column.

| Fraction | Code | Level of bitter perception <sup>a</sup> |     |     |     |     | Mean | $\pm$ sd |
|----------|------|-----------------------------------------|-----|-----|-----|-----|------|----------|
|          |      | J#1                                     | J#2 | J#3 | J#4 | J#5 |      |          |
| 1        | A    | 0                                       | 0   | 0   | 0   | 0   | 0    | 0        |
| 2        | B    | 0                                       | 0   | 0   | 0   | 0   | 0    | 0        |
| 3        | C    | 1                                       | 0   | 0   | 0   | 0   | 0    | 0        |
| 4        | D    | 1                                       | 1   | 0   | 1   | 1   | 1    | 0        |
| 5        | E    | 1                                       | 1   | 1   | 1   | 1   | 1    | 0        |
| 6        | F    | 2                                       | 2   | 2   | 2   | 2   | 2    | 0        |
| 7        | G    | 3                                       | 2   | 3   | 3   | 3   | 3    | 0        |
| 8        | H    | 3                                       | 3   | 3   | 3   | 3   | 3    | 0        |
| 9        | I    | 3                                       | 3   | 3   | 2   | 3   | 3    | 0        |
| 10       | L    | 3                                       | 3   | 3   | 3   | 3   | 3    | 0        |
| 11       | M    | 2                                       | 1   | 1   | 1   | 1   | 1    | 0        |
| 12       | N    | 1                                       | 1   | 1   | 1   | 1   | 1    | 0        |
| 13       | O    | 1                                       | 1   | 1   | 1   | 2   | 1    | 0        |
| 14       | P    | 2                                       | 3   | 2   | 3   | 3   | 3    | 1        |
| 15       | Q    | 1                                       | 1   | 1   | 2   | 1   | 1    | 0        |
| 16       | R    | 1                                       | 1   | 1   | 1   | 1   | 1    | 0        |
| 17       | S    | 1                                       | 1   | 1   | 1   | 1   | 1    | 0        |
| 18       | T    | 1                                       | 1   | 1   | 1   | 1   | 1    | 0        |
| 19       | U    | 1                                       | 1   | 1   | 1   | 1   | 1    | 0        |
| 20       | V    | 2                                       | 2   | 2   | 3   | 2   | 2    | 0        |
| 21       | Z    | 4                                       | 4   | 4   | 4   | 4   | 4    | 0        |

<sup>a</sup> Level of bitter perception: 0) no bitter taste; 1) barely detectable; 2) weak, 3) moderate 4) strong.

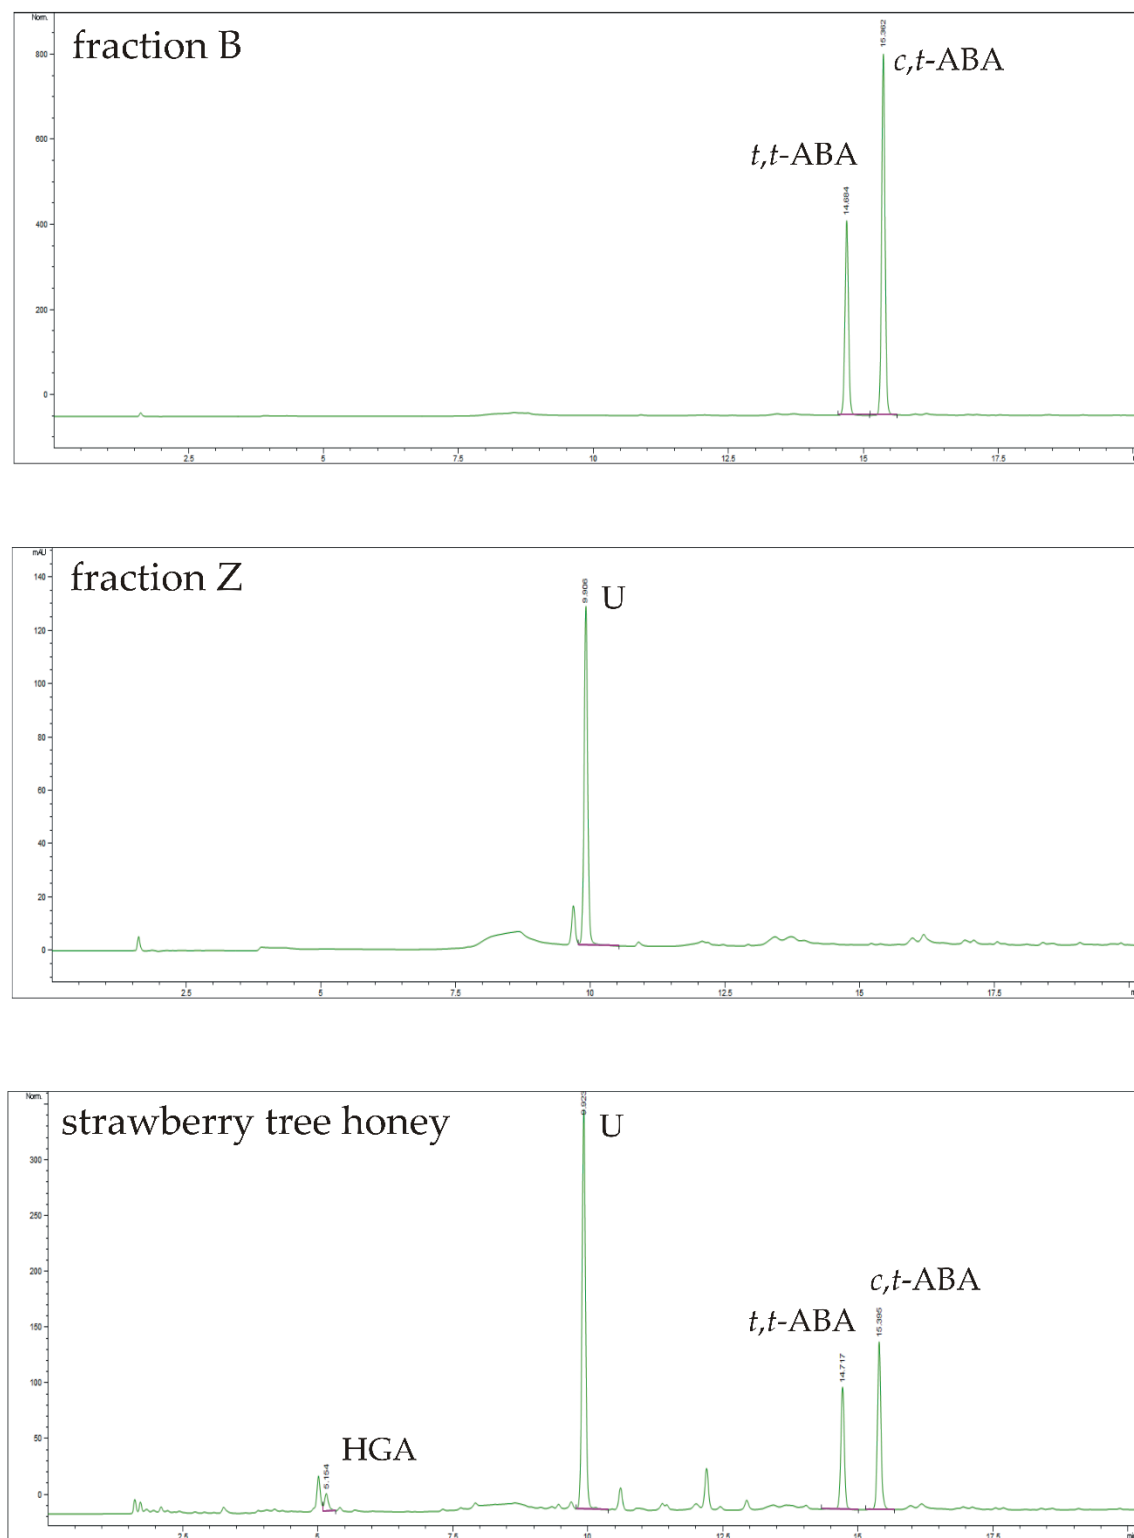

**Figure S1.** LC-DAD representative chromatograms at  $\lambda = 262$  nm of fraction B, fraction Z, and pure strawberry tree honey (dilution 1:100 in water w/v). *t,t*-ABA: ( $\pm$ )-2-*trans*,4-*trans*-abscisic acid; *c,t*-ABA: ( $\pm$ )-2-*cis*,4-*trans*-abscisic acid; U: unedone; HGA: homogentisic acid. Chromatographic conditions are described in the text.
